1 **Research Letter: Therapeutic targets for haemorrhoidal disease: proteome-wide**

2 **Mendelian randomisation and colocalization analyses**

3 Shifang Li<sup>#\*</sup>, Meijiao Gong<sup>#</sup>

4 Laboratory of Immunology and Vaccinology, FARAH, ULiège, Liège 4000, Belgium.

5 <sup>#</sup>Shifang Li and Meijiao Gong contributed equally to this work

6 \*Correspondence:

7 Shifang Li, [fruceslee@gmail.com](mailto:fruceslee@gmail.com)

8 Laboratory of Immunology and Vaccinology, FARAH, ULiège, Liège 4000, Belgium

9

10

11

12

13

14

15

16

17

18

19

20

21

22

## 23 **Abstract**

24 Human haemorrhoidal disease (HEM) is a common anorectal pathology.  
25 However, the etiology of HEM, as well as its molecular mechanism, remains largely  
26 unclear. In this study, we applied a two-sample bi-direction Mendelian randomisation  
27 (MR) analysis to estimate the causal effects of 4907 plasma proteins on HEM  
28 outcomes and investigated the mediating impacts of plasma proteins on HEM risk  
29 factors to uncover potential HEM treatment targets by integrating GWASs statistics of  
30 HEM and plasma protein levels. Following MR analysis, our study identified 5  
31 probable causal proteins associated with HEM. ERLEC1 and ASPN levels were  
32 genetically predicted to be positively and inversely associated with HEM risk,  
33 respectively, with strong evidence of colocalization ( $H4 > 0.9$ ). The findings of an  
34 independent cohort corroborate the causal relationship between these two proteins and  
35 HEM. Furthermore, gene expression analysis of haemorrhoidal tissue and normal  
36 specimens revealed that ERLEC1 but not ASPN were differentially expressed. By  
37 analyzing single-cell ERLEC1 expression in human rectum tissues, ERLEC1 was  
38 found to be highly expressed in transient-amplifying cells. Interestingly, a genetically  
39 greater risk of myxoedema was linked to an elevated risk of HEM. However, there  
40 was no evidence that dorsalgia, hernia, diverticular disease, and ankylosing  
41 spondylitis were causally associated with HEM. Furthermore, no association was  
42 found between myxoedema and the genetically predicted ERLEC1 and ASPN levels.  
43 Overall, this study identified some causal associations of circulating proteins and risk  
44 factors with HEM by integrating the largest-to-date plasma proteome and GWASs of

45 HEM. The findings could provide further insight into understanding biological  
46 mechanisms for HEM.

#### 47 **Keywords**

48 Haemorrhoidal disease, Mendelian randomisation, ERLEC1, myxoedema

49

50 Human haemorrhoidal disease (HEM) is a common anorectal disorder. Recently,  
51 Zhang *et al.* reported the first and largest genome-wide association study (GWAS)  
52 with haemorrhoidal disease (HEM), and these data offered us a resource for  
53 understanding the genetic risk factors for HEM.<sup>1</sup> However, the etiology of HEM, as  
54 well as its molecular mechanism, remains primarily unclear.<sup>2</sup> In addition, the  
55 identification of genes with therapeutic effects needs to be conducted. In recent years,  
56 by incorporating protein quantitative trait loci (pQTLs) into MR analysis, such an  
57 approach has been successfully used to prioritize therapy targets.<sup>3,4</sup> Here, using a  
58 two-sample bidirectional Mendelian randomisation (MR) analysis, we estimated the  
59 causal effects of 4907 plasma proteins on HEM outcomes, and investigated the effects  
60 of plasma proteins that may mediate the impact of risk factors on HEM in order to  
61 identify potential therapeutic targets for HEM.

62 As stated in the **supplementary methods**, 4907 proteins (*cis*-pQTLs) were used  
63 as instrumental variables for exposure and HEM as the outcome to estimate the causal  
64 effect of plasma protein levels on HEM in a proteome-wide context using MR  
65 analysis.<sup>5-8</sup> Our study revealed 5 potential causative proteins at the  
66 Bonferroni-corrected threshold of  $p < 1.01 \times 10^{-5}$ , including 3 negative and 2 positive

67 associations (**figure 1A-1B**). MR analysis, for example, revealed that genetically  
68 predicted ERLEC1 levels were linked to an increased risk of HEM ( $p=5.18e-07$ ). To  
69 determine whether the identified relationships of the circulating protein with HEM  
70 shared causative variations, colocalization analysis was carried out and a high level of  
71 support for colocalization evidence was discovered between two proteins (ERLEC1  
72 and ASPN) and HEM ( $H4>0.9$ ) (**figure 1C**). The findings of the INTERVAL cohort  
73 corroborated the causal relationship between these two proteins and HEM (**figure**  
74 **1D**).<sup>9</sup> Interestingly, the deCODE study's lead cis-pQTL for the ERLEC1 (rs2542580)  
75 but not ASPN (rs10992273) were not found to be associated with all available  
76 secondary traits (**supplementary table1**). Gene expression analysis of haemorrhoidal  
77 tissue and normal specimens revealed that ERLEC1 but not ASPN were differentially  
78 expressed after controlling for gender and BMI (**figure 1E**), further supporting that a  
79 high ERLEC1 expression level was associated with an increased risk of HEM.  
80 Following that, we investigated the tissues in which ERLEC1 is expressed in bulk  
81 tissues using GTEx v8 (<https://gtexportal.org/>), and found that ERLEC1 was  
82 considerably expressed in multiple tissues, including the small intestine and colon, as  
83 compared to the whole blood ( $p<0.001$ ) (**figure 1F**). To further understand the origin  
84 of ERLEC1, single-cell ERLEC1 expression was assessed in human rectum tissues,  
85 and ERLEC1 was found to be highly expressed in transient-amplifying (TA) cells ( $p<$   
86  $0.05$ ) (**figure 1G**).<sup>10</sup>

87 In order to investigate whether the causal protein mediates the effect of risk  
88 factors on HEM, the causal risk factors for HEM were first identified. 5 clinical traits

89 that genetically correlated with HEM were selected (**supplementary methods**), with  
90 instrumental variables generated from GWASs confined to European populations. It  
91 was discovered that a genetically greater risk of myxoedema was linked to an elevated  
92 risk of HEM ( $p < 0.05$ ) (**figure 1H**). Although genetic correlations with HEM were  
93 reported,<sup>1</sup> there was no evidence that dorsalgia, hernia, diverticular disease, and  
94 ankylosing spondylitis were causally associated ( $p > 0.05$ ). In order to identify the  
95 protein related to HEM risk factors, we conducted MR analysis again on 2 plasma  
96 proteins impacting HEM with myxoedema. After filtering, there was a lack of  
97 evidence that myxoedema had a causal relationship with these two plasma proteins  
98 (**figure 1I**).

99 Overall, by integrating the largest-to-date plasma proteome and GWAS of HEM,  
100 we discovered that ERLEC1 could serve as prospective protein therapeutic targets for  
101 HEM. In-depth research is needed to investigate the mechanisms by which putative  
102 risk factors affect HEM (**figure 1J**).

### 103 **Competing interests**

104 None declared.

### 105 **Contributors**

106 SF was involved in conceptualization. SF and MJ were involved in the formal  
107 analysis. SF was involved in writing, reviewing, and editing.

### 108 **Acknowledgments**

109 The authors would like to thank all of the researchers who contributed to the GWAS  
110 datasets used in this study for making them available for research purposes.

111 **References**

- 112 1 Zheng T, Ellinghaus D, Juzenas S, *et al.* Genome-wide analysis of 944 133  
113 individuals provides insights into the etiology of haemorrhoidal disease. *Gut*  
114 2021;70:1538-49.
- 115 2 EAM Festen & RK Weersma. Large-scale genetic analyses in an understudied  
116 disease: haemorrhoidal disease. *Gut* 2021;70:1429-1430.
- 117 3 Bovijn J, Lindgren CM & Holmes MV. Genetic variants mimicking therapeutic  
118 inhibition of IL-6 receptor signaling and risk of COVID-19. *The Lancet*  
119 *Rheumatology* 2020;2:e658-9.
- 120 4 Dewey, F. E. *et al.* Genetic and Pharmacologic Inactivation of ANGPTL3 and  
121 Cardiovascular Disease. *N Engl J Med* 2017;377:211-21.
- 122 5 Ferkingstad E, Sulem P, Atlason BA, *et al.* Large-scale integration of the plasma  
123 proteome with genetics and disease. *Nat Genet* 2021;53:1712-21.
- 124 6 Zheng J, Haberland V, Baird D, *et al.* Phenome-wide Mendelian randomisation  
125 mapping the influence of the plasma proteome on complex diseases. *Nat Genet*  
126 2020;52:1122-31.
- 127 7 Chen L, Peters JE, Prins B, *et al.* Systematic Mendelian randomisation using the  
128 human plasma proteome to discover potential therapeutic targets for stroke. *Nat*  
129 *Commun* 2022;13:1-14.
- 130 8 Yoshiji S, Butler-Laporte G, Lu T, *et al.* Proteome-wide Mendelian randomisation  
131 implicates nephronectin as an actionable mediator of the effect of obesity on  
132 COVID-19 severity. *Nat Metab* 2023;5:248-64.

133 9 Sun BB, Maranville JC, Peters JE, Stacey D, Staley JR, Blackshaw J, Burgess S,  
134 Jiang T, Paige E, Surendran P, *et al.* Genomic atlas of the human plasma proteome.  
135 *Nature* 2018;558, 73-79.

136 10 Wang Y, Song W, Wang J, *et al.* Single-cell transcriptome analysis reveals  
137 differential nutrient absorption functions in human intestine. *J Exp Med*  
138 2020;217(2):e20191130.

139

## 140 **Figure Legends**

141 **Figure 1 Mendelian randomisation results.** (A) The effect of plasma protein levels  
142 on HEM. Volcano plot indicating the effect of plasma protein on HEM using MR  
143 analysis. (B) Forest plots shows the effect of plasma ERLEC1 and ASPN levels on  
144 HEM. (C) Colocalization analysis of ERLEC1 levels (Up) and ASPN (Down). (D)  
145 Forest plots shows the effect of plasma ERLEC1 and ASPN levels on HEM using  
146 INTERVAL cohort. (E) Boxplot shows differentially expressed genes in HEM  
147 patients when compared to healthy individuals. *p*-values were corrected the effect of  
148 gender and BMI using linear model. (F) The violin plot depicts ERLEC1 gene  
149 expression across multiple bulk tissues. (G) Data visualization of cell populations in  
150 human rectum tissues using UMAP (left) and gene expression of ERLEC1 in different  
151 cell types (right). (H) Forest plots showing the causal effect of chosen risk factors on  
152 HEM. (I) Forest plots for the effect of myxoedema on plasma ERLEC1 and ASPN  
153 levels. (J) Schematic illustration of the proposed model in the study. HEM,  
154 haemorrhoidal disease.

155 **Supplementary Methods** The statistics method used in the study.

156 **Supplementary Tables1** The significant MR summary statistics obtained in this  
157 study.

158

159

160

161

162

163

164

165

166

167

168

169

170

171

172

173

174

175

176



## 177 **Supplementary Methods**

### 178 **GWASs of haemorrhoidal disease and risk factors**

179 We used recently published large-scale genome-wide associations (GWASs) for  
180 haemorrhoidal disease (HEM).<sup>1</sup> This GWAS summary statistics were derived from  
181 944,133 European ancestry individuals (Ncase = 218,920 and Ncontrol = 725,213)  
182 from 5 cohorts and downloaded from the GWAS Catalog  
183 (<https://www.ebi.ac.uk/gwas/>, access ID: EFO\_0009552). Diverticular disease of the  
184 intestine, ankylosing spondylitis (AS), dorsalgia, hernia, and myxoedema were  
185 evaluated as potential causal risk factors associated with HEM in order to determine  
186 the probable causal risk factors. All GWASs for the five risk factors were obtained  
187 from the ieu open gwas project (<https://gwas.mrcieu.ac.uk/datasets/>). The summary  
188 statistics of the large GWAS (14,357 cases and 182,423 controls) were used for  
189 diverticular disease of the intestine (access ID: finn-b-K11\_DIVERTIC). The GWAS  
190 for ankylosing spondylitis (access ID: finn-b-M13\_ANKYLOSPON) have a sample  
191 size of 1,462 cases and 164,682 controls. The GWAS for myxoedema (access ID:  
192 ieu-b-4877) has a sample size of 311,629 cases and 321,173 controls. The GWAS for  
193 dorsalgia (access ID: finn-b-M13\_DORSALGIA) included 193467 individuals, with  
194 28,785 cases and 164,682 controls. A total of 218792 individuals were reported with  
195 GWAS of hernia (access ID: finn-b-K11\_HERNIA), including 28,235 cases and  
196 190,557 controls.

### 197 **Plasma protein quantitative trait loci (pQTL) data**

198 To conduct proteome-wide Mendelian randomisation (MR), we first obtained

199 genetic instrumental variables using the protein quantitative trait loci (pQTL) data  
200 generated by Ferkingstad *et al.*<sup>2</sup> The largest-to-date pQTL analysis on plasma  
201 proteome (a total of 4907 proteins) in 35,559 Icelanders was performed in their study,  
202 and an amount of 18,084 pQTL associations between genetic variation and protein  
203 levels in plasma were identified. A total of 4907 pQTLs were successfully  
204 downloaded from the deCODE study using aria2c.<sup>3</sup> To minimize the risk of horizontal  
205 pleiotropy, instrumental variables to *cis*-pQTLs (SNPs located within a 500 kb  
206 window from the target gene body) of protein were selected for the following analysis.  
207 In order to validate the MR results for ASPN and ERLEC1 using independent study,  
208 the *cis*-pQTLs of ASPN and ERLEC1 were obtained from the INTERVAL cohort and  
209 used for the following analysis.<sup>4</sup>

## 210 **Mendelian randomisation analysis**

211 MR analysis is an analytical method that uses genetic variation as an  
212 instrumental variable (IV) to estimate causal effects. It overcomes the limitations of  
213 measurement error and confounding factors that are common in observational studies  
214 and is widely used to assess causal relationships.<sup>5</sup> In this study, the TwoSampleMR  
215 package (v0.5.6, <https://mrcieu.github.io/TwoSampleMR/>) was used for MR  
216 analysis.<sup>6</sup> The instrumental variables that determined the exposure in each MR study  
217 were specified as genome-wide significant ( $p \leq 5e-08$ ) SNPs. SNPs in the human  
218 major histocompatibility complex (MHC) region at chromosome 6:  
219 28,477,797-33,448,354 (GRCh37) were excluded from the analysis due to its complex  
220 linkage disequilibrium (LD) structure. Using the 1000 Genomes Project European

221 reference panel and an LD threshold of  $r^2 < 0.001$  with a clumping window of 10,000  
222 kb, PLINK v.1.9 (<http://pngu.mgh.harvard.edu/purcell/plink/>) was employed to derive  
223 instrumental variables.<sup>7-8</sup> F-statistics were used to determine the strength of each  
224 SNP's association with exposure, and F-statistics of more than 10 were considered  
225 strong. For the main MR analysis, the inverse variance weighted approach for proteins  
226 with two or more instrumental variables and the wald ratio method for proteins with a  
227 single instrumental variable was used for evaluating the causal influence of exposure  
228 on outcome. In addition, in the case of more instrumental variables used in MR  
229 analysis, four additional MR methods (weighted median, simple mode, weighted  
230 mode, and MR-Egger method) were used to assess the reliability of the primary  
231 results. For exposures with multiple IVs, we additionally investigated heterogeneity  
232 across variant-level MR estimations with the "mr\_heterogeneity()" function in the  
233 TwoSampleMR package (Cochrane's Q test). In addition, a pleiotropy test was  
234 performed using MR Egger analysis to determine whether there is horizontal  
235 pleiotropy among IVs. Meanwhile, "phenoscanner"  
236 (<https://github.com/phenoscanner/phenoscanner>) was to be utilized to determine any  
237 pleiotropy of SNPs used in the MR analysis. An SNP was regarded to be pleiotropic  
238 when the reported SNP-traits association was genome-wide significant ( $p \leq 5e-08$ ) in  
239 the European population.

240 Finally, in the event there were more than two IVs in exposure, a leave-one-out  
241 analysis was performed, and the MR findings of the remaining IVs were calculated by  
242 deleting the IVs one by one to ensure the robustness of the MR data. To acquire robust

243 evidence for the casual estimation, MR findings that meet all of the following criteria  
244 were chosen as described by Yoshiji and others: (1) no pleiotropy was found using  
245 MR-Egger regression ( $p>0.05$ ); (2) results with an  $I^2 < 50\%$  (no substantial  
246 heterogeneity); (3) leave-one-out analysis MR  $p<0.05$  after removing outliers; and (4)  
247 reverse MR  $p>0.05$ .<sup>9</sup> The same procedure as mentioned above was utilized to explore  
248 the causal effect of the given exposure and associated outcome in the reverse MR  
249 analysis.  $p$ -values less than a Bonferroni adjusting ( $p=1.01\times 10^{-5}$  (0.05/4,907)) are  
250 deemed significant for multiple testing.

### 251 **Colocalization analysis**

252 The coloc R package was employed to investigate whether the reported  
253 relationships between proteins and HEM were driven by linkage disequilibrium.<sup>10</sup> The  
254 analysis offers posterior probability for each hypothesis tested: no association in  
255 either group (H0), pQTL only (H1), the GWAS of HEM only (H2), associations with  
256 both GWAS but by separate causal signals (H3), and associations with both GWAS  
257 but by the same signals (H4).<sup>11</sup> A higher H4 ( $H4>0.8$ ) was considered as strong  
258 evidence for colocalization, implying a shared variation between the two  
259 phenotypes.<sup>10,11</sup>

### 260 **Differentially expressed genes analysis in bulk tissues**

261 The GSE154650 dataset was downloaded from NCBI Gene Expression Omnibus  
262 (GEO) and analyzed using the R program.<sup>12</sup> The RPM value of ERLEC1 and ASPN  
263 were further subjected to linear model analysis to investigate the differential gene  
264 expression in HEM and healthy individuals after correcting for the effects of gender

265 and BMI. The expression data of ERLEC1 from 39 tissues across 838 individuals  
266 were obtained from the GTEx v8 (<https://gtexportal.org/>).<sup>13</sup> Mann-Whitney U test was  
267 performed to determine the significance of ERLEC1 expression differences between  
268 the two groups, and  $p < 0.01$  was declared significant.

### 269 **scRNA-sequencing analysis of human rectum tissues**

270 For processing scRNA data (GSE125970), the raw data of the gene expression  
271 matrix was first downloaded from NCBI Gene Expression Omnibus (GEO) and  
272 converted into a Seurat object using the R Seurat package.<sup>14,15</sup> Low-quality cells were  
273 eliminated if they met any of the following requirements: (1) 3000 UMIs; (2) 200  
274 genes; and (3) >50% of UMIs derived from the mitochondrial genome. UMI counts  
275 were normalized using the NormalizeData function, and the top 2000 features with  
276 the greatest cell-to-cell variation were calculated using the FindVariableFeatures  
277 function. To correct the batch effects among samples, the "FindIntegrationAnchors"  
278 and "IntegrateData" functions were employed. Following that, the ScaleData function  
279 was used to scale and center features in the datasets, and the RunPCA function with  
280 default parameters was used to reduce dimensionality. The data were then used for  
281 nonlinear dimensional reduction with the RunUMAP function and cluster analysis  
282 with the FindNeighbors and FindClusters functions. The FindAllMarkers function  
283 was used to identify differentially expressed genes (DEG) for a given cluster. The  
284 clusters were labeled in the same way that Wang *et al.* did in their study.<sup>15</sup>

### 285 **References**

286 1 Zheng T, Ellinghaus D, Juzenas S, *et al.* Genome-wide analysis of 944 133

287 individuals provides insights into the etiology of haemorrhoidal disease. *Gut*  
288 2021;70:1538-49.

289 2 Ferkingstad E, Sulem P, Atlason BA, *et al.* Large-scale integration of the plasma  
290 proteome with genetics and disease. *Nat Genet* 2021;53:1712-21.

291 3 Aria2c Multi-source Download Utility. Available: <http://aria2.sourceforge.net/>

292 4 Sun BB, Maranville JC, Peters JE, Stacey D, Staley JR, Blackshaw J, Burgess S,  
293 Jiang T, Paige E, Surendran P, *et al.* Genomic atlas of the human plasma proteome.  
294 *Nature* 2018;558, 73-79.

295 5 Skrivankova VW, Richmond RC, Woolf BAR, *et al.* Strengthening the reporting of  
296 observational studies in epidemiology using mendelian randomisation  
297 (STROBE-MR): Explanation and elaboration. *BMJ* 2021;375. doi:10.1136/bmj.n2233

298 6 Hemani G, Zheng J, Elsworth B, *et al.* The MR-base platform supports systematic  
299 causal inference across the human phenome. *Elife* 2018;7:1-29.

300 7 Auton A, Abecasis GR, Altshuler DM, *et al.* A global reference for human genetic  
301 variation. *Nature* 2015;526:68-74.

302 8 Purcell S, Neale B, Todd-Brown K, *et al.* PLINK: A tool set for whole-genome  
303 association and population-based linkage analyses. *Am J Hum Genet* 2007;81:559-75.

304 9 Yoshiji S, Butler-Laporte G, Lu T, *et al.* Proteome-wide Mendelian randomisation  
305 implicates nephronectin as an actionable mediator of the effect of obesity on  
306 COVID-19 severity. *Nat Metab* 2023;5:248-64.

307 10 Giambartolomei C, Vukcevic D, Schadt EE, *et al.* Bayesian test for colocalisation  
308 between pairs of genetic association studies using summary statistics. *PLoS Genet*

309 2014;10:e1004383.

310 11 Foley CN, Staley JR, Breen PG, *et al.* A fast and efficient colocalization algorithm  
311 for identifying shared genetic risk factors across multiple traits. *Nat Commun*  
312 2021;12.

313 12 Zheng T, Ellinghaus D, Juzenas S, *et al.* Genome-wide analysis of 944 133  
314 individuals provides insights into the etiology of haemorrhoidal disease. *Gut*  
315 2021;70:1538-49.

316 13 Carithers LJ, Moore HM. The Genotype-Tissue Expression (GTEx) Project.  
317 *Biopreserv Biobank* 2015;13:307-8.

318 14 Hao Y, Hao S, Andersen-Nissen E & Mauck WM. Integrated analysis of  
319 multimodal single-cell data. Preprint at bioRxiv  
320 <https://doi.org/10.1101/2020.10.12.335331>.

321 15 Wang Y, Song W, Wang J, *et al.* Single-cell transcriptome analysis reveals  
322 differential nutrient absorption functions in human intestine. *J Exp Med*  
323 2020;217(2):e20191130.

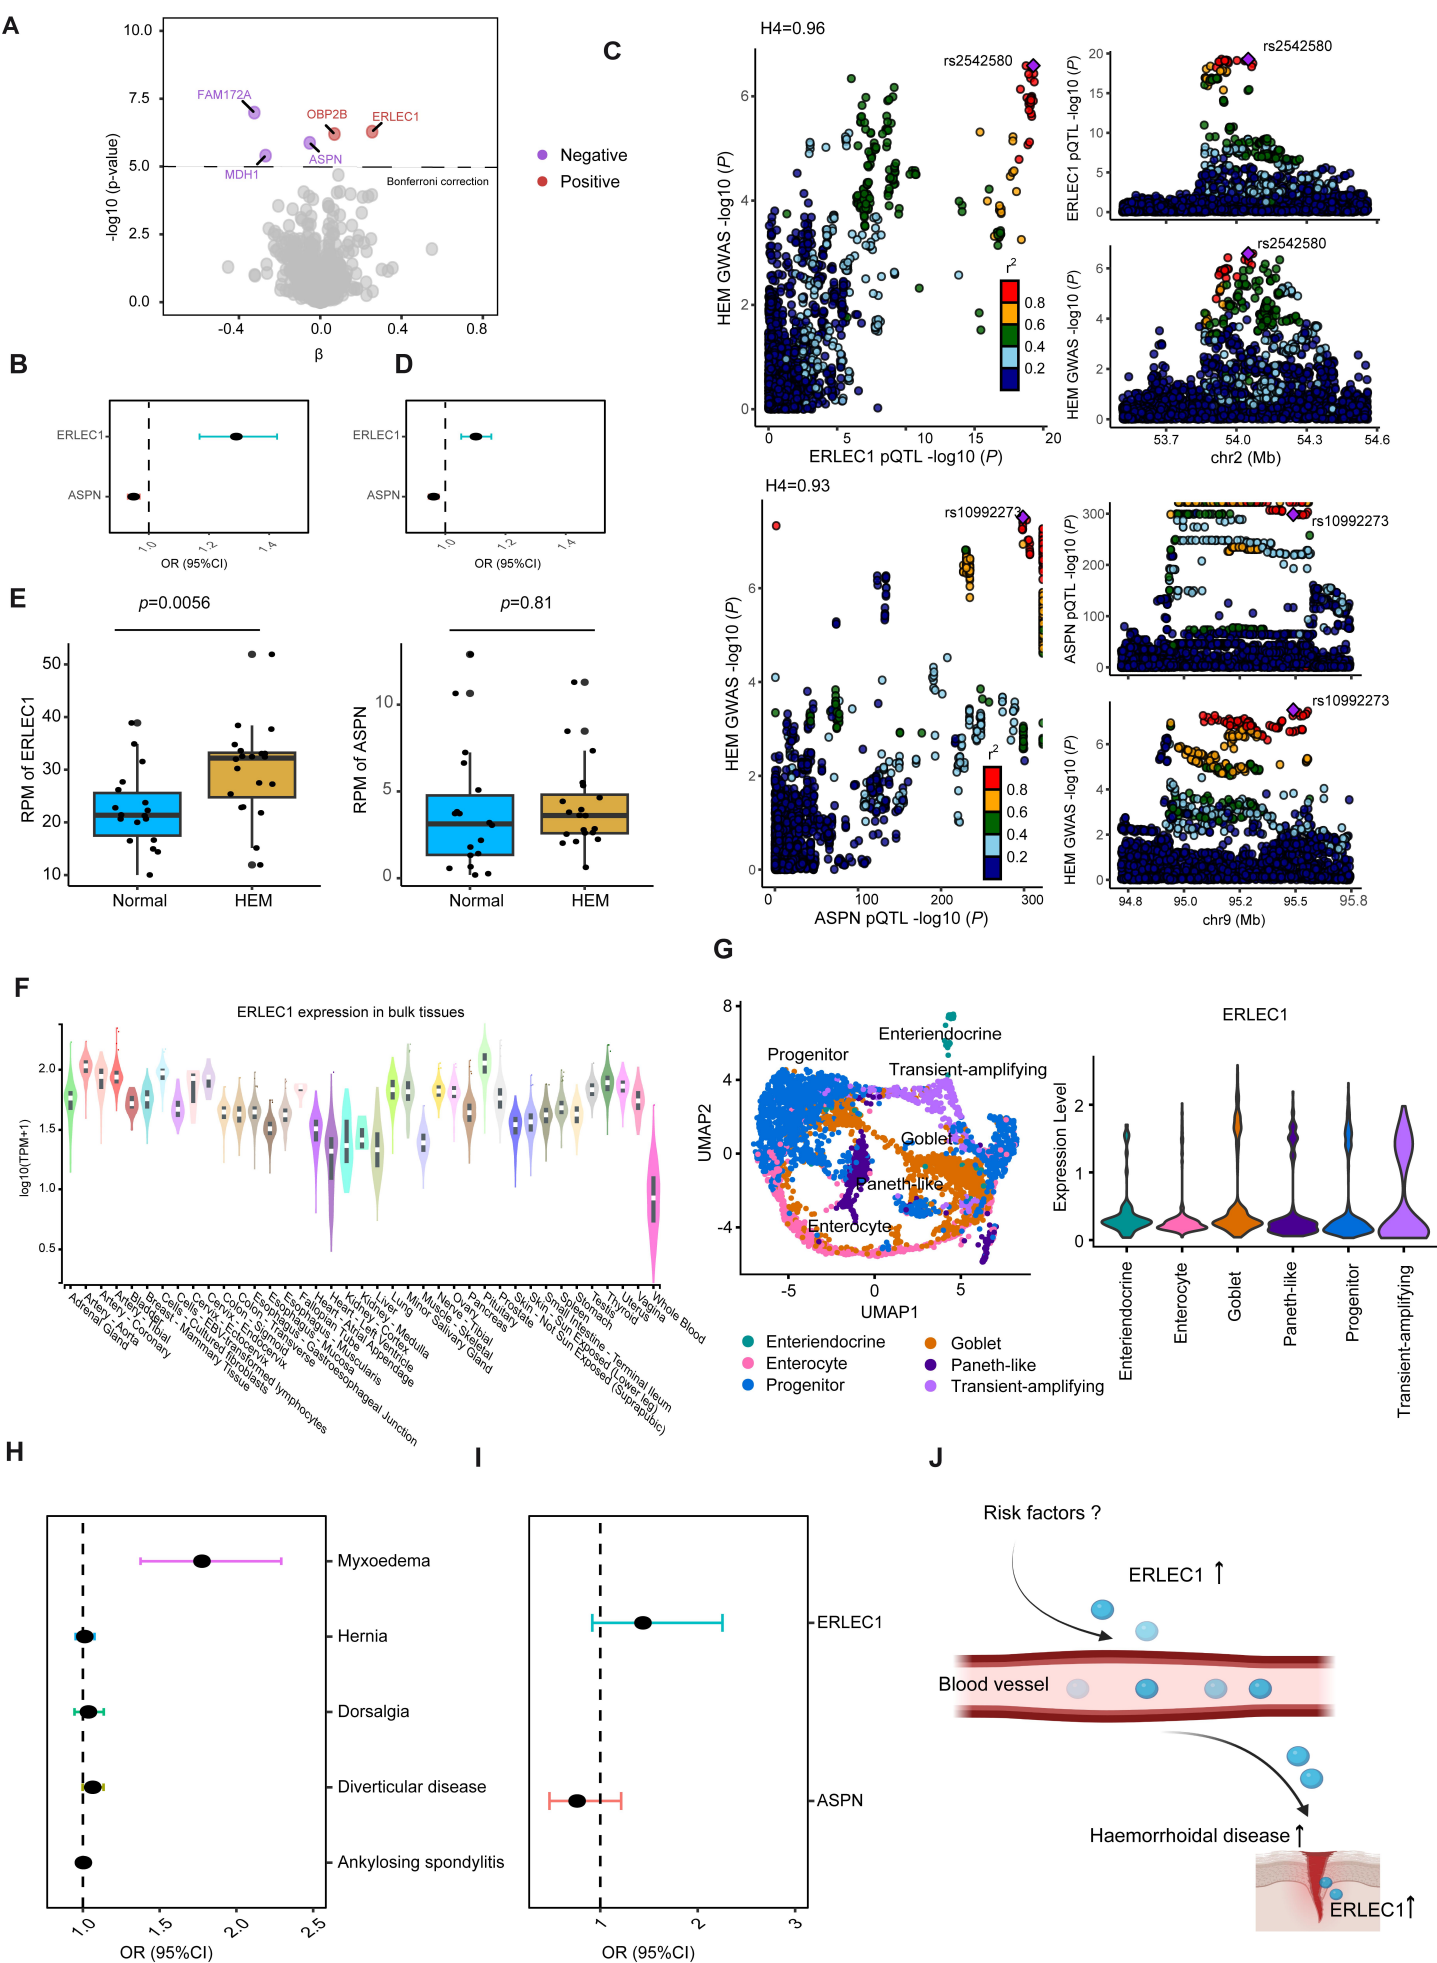

Source: https://medrxiv.org/content/10.1101/2023.06.19.23291373v3.full.pdf
